# Supplementary material for: Photosalient and thermosalient crystalline hemithioindigo-anthracene based isomeric photoswitches
Source: Royal Society of Chemistry journal article supplement (doi:10.1039/d1tc01358k), 2021-01-01
Supplement: d1tc01358k1.pdf [file d1tc01358k1.pdf]

## Supplementary Information

### **Photo- and Thermo- Salient Crystalline Hemithioindigo-Anthracene Based Isomeric Photoswitches**

*Duane Hean, Luis G. Alde, Michael O. Wolf\**

Department of Chemistry, University of British Columbia, 2036 Main Mall, Vancouver, British  
Columbia, V6T 1Z1, Canada

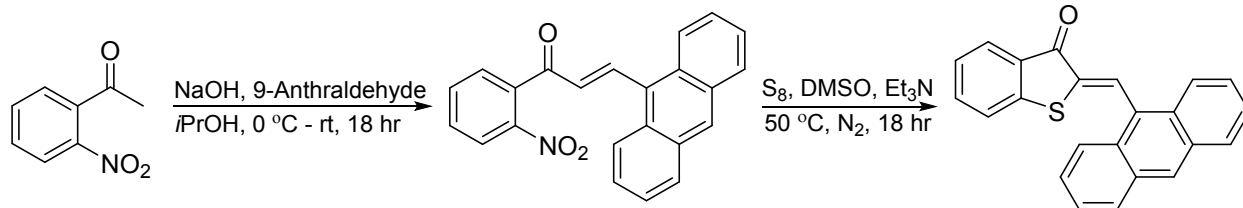

**Scheme S1.** Synthesis of the hemithioindigo photoswitch (*Z*)-HTI-An.

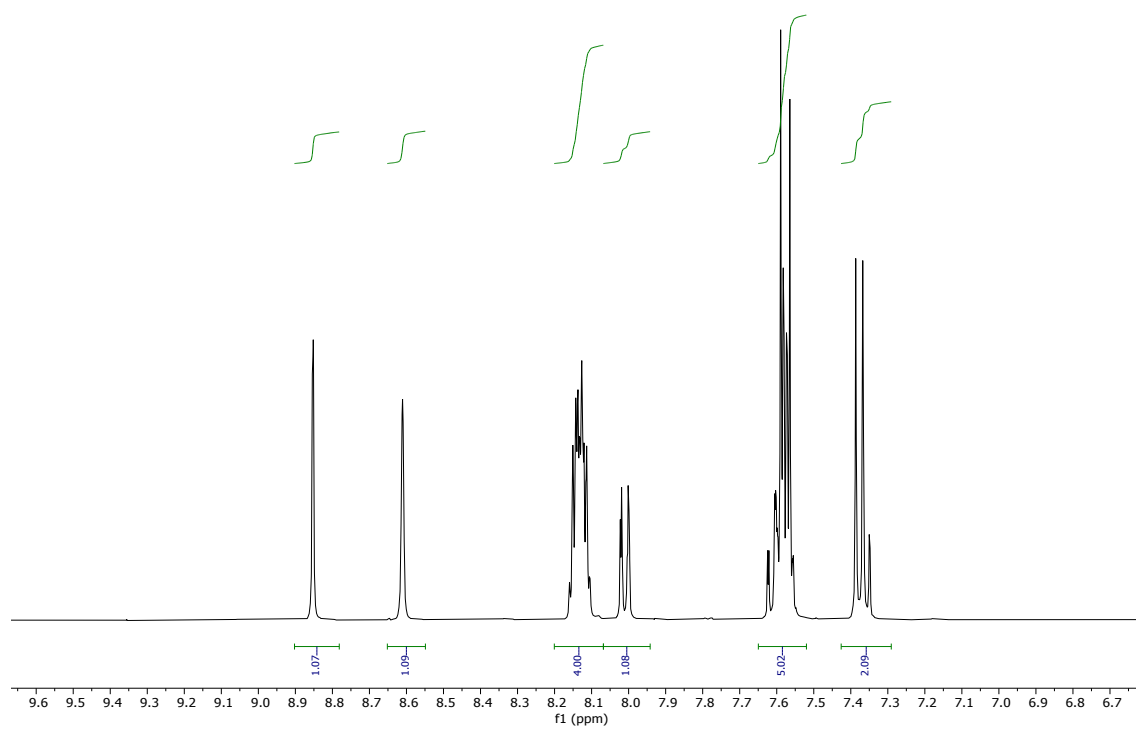

**Figure S1.**  $^1\text{H NMR}$  (400 MHz) spectrum of (*Z*)-HTI-An in  $\text{CD}_2\text{Cl}_2$ .

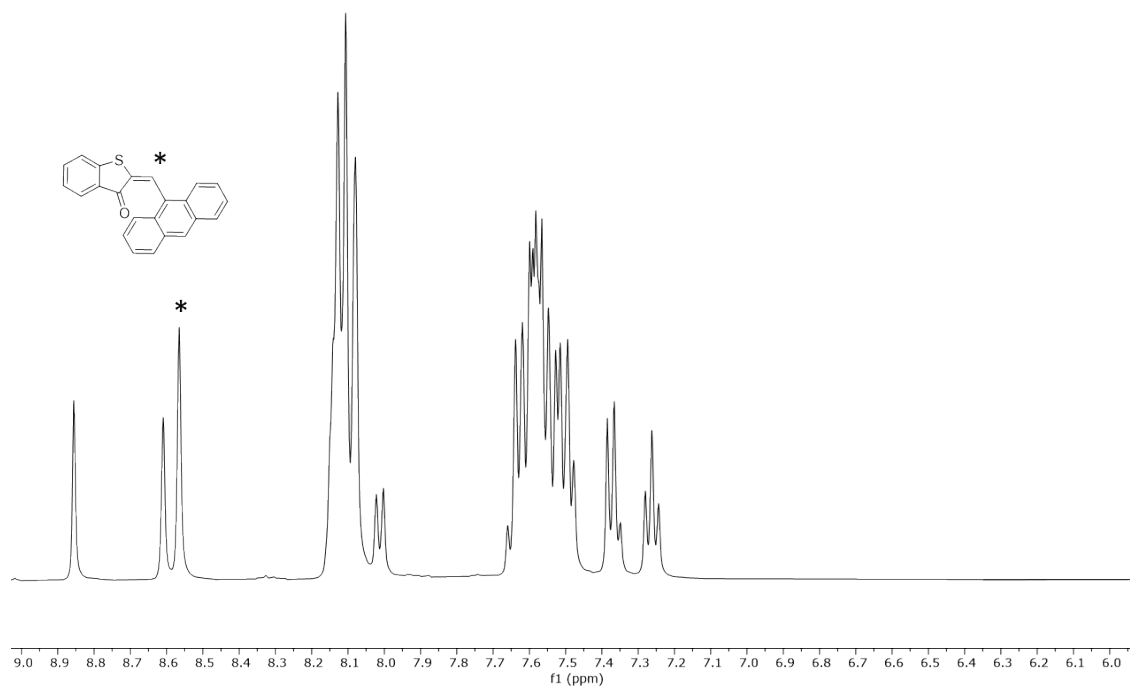

**Figure S2.**  $^1\text{H}$  NMR (400 MHz) spectrum of (*E*)-HTI-An in  $\text{CD}_2\text{Cl}_2$  at 80 % isomeric purity.

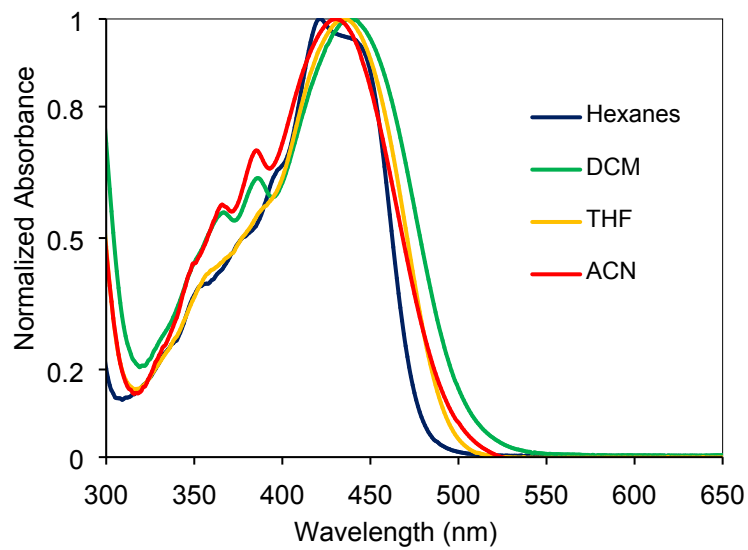

**Figure S3.** UV-Vis absorption spectra of (*Z*)-HTI-An in various solvents.

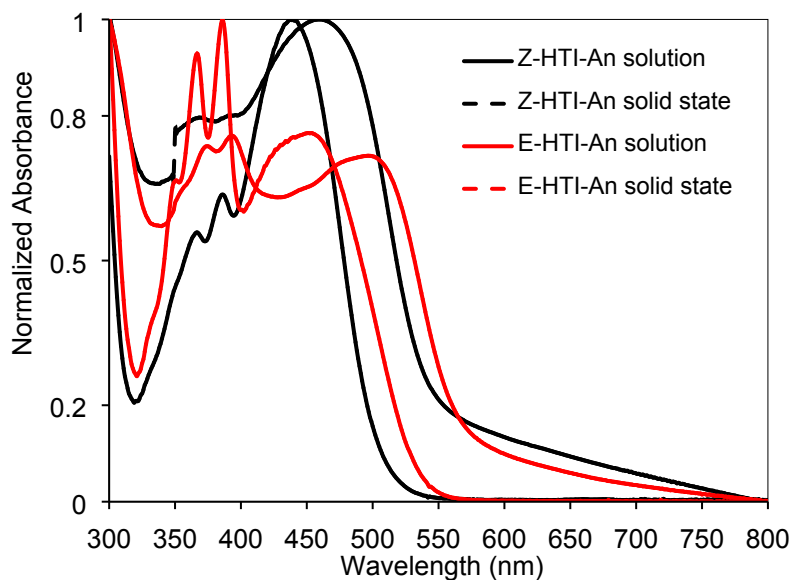

**Figure S4.** UV-Vis absorption spectra of solution (solid) and solid state (dashed) of (*Z*)-**HTI-An** (red) and (*E*)-**HTI-An** (black).

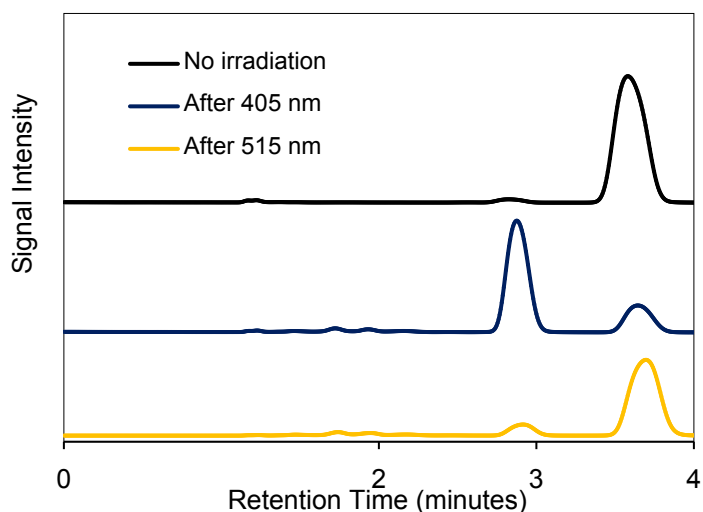

**Figure S5.** HPLC spectra of photo products from solution irradiation of **HTI-An**. Before irradiation the ratio was ~98 % (*Z*)-**HTI-An**, after 30 minutes of 405 nm irradiation resulting in 23 % (*Z*)-**HTI-An**: 77 % (*E*)-**HTI-An**. Following 515 nm irradiation for 30 minutes the isomerization reaction yielded 90 % (*Z*)-**HTI-An** : 10 % (*E*)-**HTI-An**.

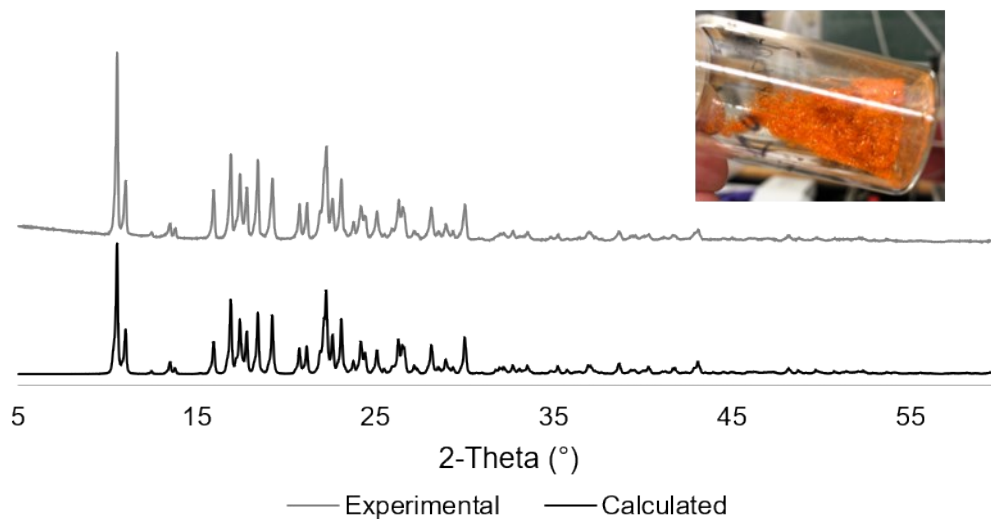

**Figure S6.** Comparison of the calculated (100 K) and experimental (298 K) powder X-ray diffractograms of (*Z*)-**HTI-An**. The inset is a photograph of the bulk material.

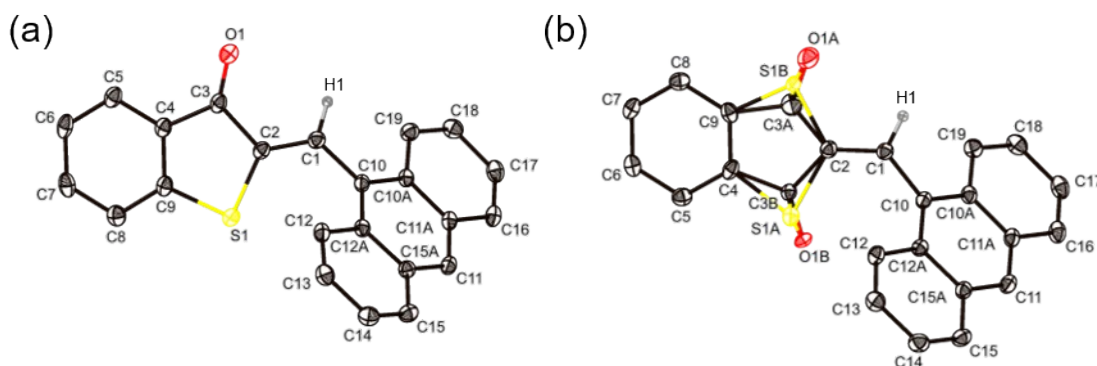

**Figure S7.** ORTEP diagrams of (a) (*Z*)-**HTI-An** and (b) (*E*)-**HTI-An** where ellipsoids are drawn at 50 % probability and hydrogen atoms are excluded for clarity. The site occupancy, modelled as disordered thioindigo fragments of (*E*)-**HTI-An** was determined to be 92.3: 7.7 **E** : **Z**.

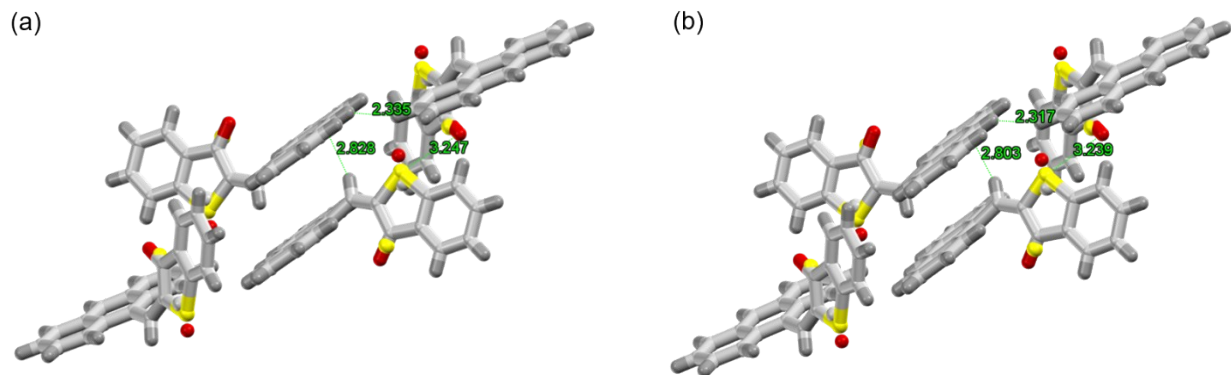

**Figure S8.** Short contact interactions of (a) (*E*)-HTI-An before irradiation and (b) (*E*)-HTI-An post photosalient event.

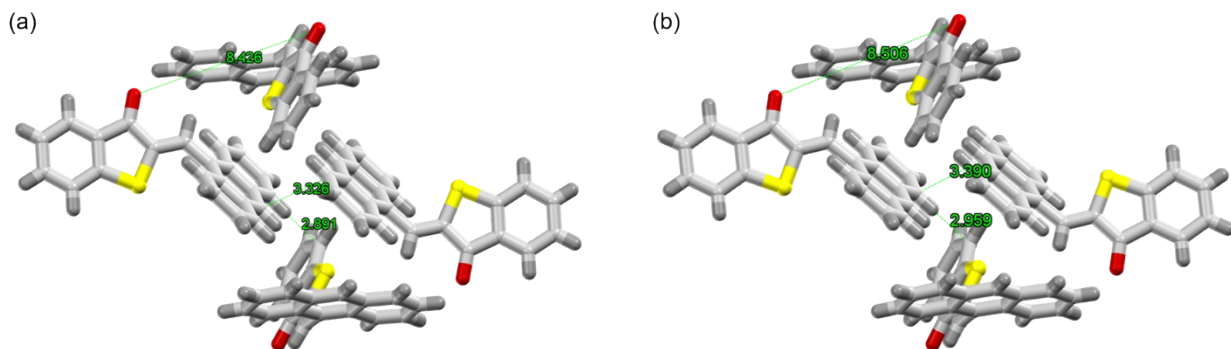

**Figure S9.** Short contact interactions and carbonyl oxygen distances of (a) (*Z*)-HTI-An at RT and (b) (*Z'*)-HTI-An at 400K.

**Table S1.** Crystal data tables of (*E*)-HTI-An before irradiation, post photosalient event, and after 2-hour heating.

| Compound          | ( <i>E</i> )-HTI-An before irradiation | ( <i>E</i> )-HTI-An post photosalient event | ( <i>E</i> )-HTI-An after 2-hour heating |
|-------------------|----------------------------------------|---------------------------------------------|------------------------------------------|
| CCDC No.          | 2068879                                | 2068880                                     | 2068881                                  |
| Empirical formula | C <sub>23</sub> H <sub>14</sub> OS     | C <sub>23</sub> H <sub>14</sub> OS          | C <sub>23</sub> H <sub>14</sub> OS       |
| Formula weight    | 338.40                                 | 338.40                                      | 338.40                                   |
| Temperature/K     | 120                                    | 133                                         | 100                                      |
| Crystal system    | monoclinic                             | monoclinic                                  | monoclinic                               |

|                                        |                                                               |                                                               |                                                               |
|----------------------------------------|---------------------------------------------------------------|---------------------------------------------------------------|---------------------------------------------------------------|
| <b>Space group</b>                     | P2 <sub>1</sub> /c                                            | P2 <sub>1</sub> /c                                            | P2 <sub>1</sub> /c                                            |
| <b>a/Å</b>                             | 10.4430(4)                                                    | 10.351(12)                                                    | 10.453(3)                                                     |
| <b>b/Å</b>                             | 13.9757(5)                                                    | 13.886(17)                                                    | 13.935(4)                                                     |
| <b>c/Å</b>                             | 11.2410(4)                                                    | 11.185(13)                                                    | 11.229(3)                                                     |
| <b>α/°</b>                             | 90                                                            | 90                                                            | 90                                                            |
| <b>β/°</b>                             | 102.9160(10)                                                  | 102.99(3)                                                     | 102.990(8)                                                    |
| <b>γ/°</b>                             | 90                                                            | 90                                                            | 90                                                            |
| <b>Volume/Å<sup>3</sup></b>            | 1599.09(10)                                                   | 1567(3)                                                       | 1593.9(8)                                                     |
| <b>Z</b>                               | 4                                                             | 4                                                             | 4                                                             |
| <b>ρ<sub>calc</sub>/cm<sup>3</sup></b> | 1.406                                                         | 1.435                                                         | 1.410                                                         |
| <b>μ/mm<sup>-1</sup></b>               | 0.210                                                         | 0.214                                                         | 0.210                                                         |
| <b>F(000)</b>                          | 704.0                                                         | 704.0                                                         | 704.0                                                         |
| <b>Crystal size/mm<sup>3</sup></b>     | 0.398 × 0.3 × 0.254                                           | 0.398 × 0.3 × 0.254                                           | 0.178 × 0.123 × 0.09                                          |
| <b>Radiation</b>                       | MoKα (λ = 0.71073)                                            | MoKα (λ = 0.71073)                                            | MoKα (λ = 0.71073)                                            |
| <b>2θ range for data collection/°</b>  | 4.002 to 61.1                                                 | 4.038 to 53.126                                               | 3.998 to 45.03                                                |
| <b>Index ranges</b>                    | -12 ≤ h ≤ 14, -19 ≤ k ≤ 16, -16 ≤ l ≤ 16                      | -13 ≤ h ≤ 13, -17 ≤ k ≤ 17, -14 ≤ l ≤ 14                      | -11 ≤ h ≤ 11, -14 ≤ k ≤ 15, -11 ≤ l ≤ 12                      |
| <b>Reflections collected</b>           | 24994                                                         | 17973                                                         | 17901                                                         |
| <b>Independent reflections</b>         | 4866 [R <sub>int</sub> = 0.0324, R <sub>sigma</sub> = 0.0266] | 3260 [R <sub>int</sub> = 0.0398, R <sub>sigma</sub> = 0.0290] | 2085 [R <sub>int</sub> = 0.0780, R <sub>sigma</sub> = 0.0429] |
| <b>Data/restraints/parameters</b>      | 4866/486/254                                                  | 3260/485/254                                                  | 2085/485/254                                                  |

|                                                   |                                                      |                                                      |                                                      |
|---------------------------------------------------|------------------------------------------------------|------------------------------------------------------|------------------------------------------------------|
| <b>Goodness-of-fit on F<sup>2</sup></b>           | 1.027                                                | 1.091                                                | 1.062                                                |
| <b>Final R indexes [I&gt;2σ(I)]</b>               | R <sub>1</sub> = 0.0361, wR <sub>2</sub> =<br>0.0862 | R <sub>1</sub> = 0.0359, wR <sub>2</sub> =<br>0.0783 | R <sub>1</sub> = 0.0358, wR <sub>2</sub> =<br>0.0709 |
| <b>Final R indexes [all data]</b>                 | R <sub>1</sub> = 0.0475, wR <sub>2</sub> =<br>0.0924 | R <sub>1</sub> = 0.0465, wR <sub>2</sub> =<br>0.0825 | R <sub>1</sub> = 0.0611, wR <sub>2</sub> =<br>0.0795 |
| <b>Largest diff. peak/hole / e Å<sup>-3</sup></b> | 0.39/-0.27                                           | 0.22/-0.21                                           | 0.17/-0.18                                           |

---

**Table S2.** Crystal data tables of (Z)-HTI-An at 298K, (Z')-HTI-An at 400K.

| <b>Compound</b>          | <b>(Z)-HTI-An</b>                  | <b>(Z')-HTI-An</b>                 |
|--------------------------|------------------------------------|------------------------------------|
| <b>CCDC No.</b>          | 2068877                            | 2068878                            |
| <b>Empirical formula</b> | C <sub>23</sub> H <sub>14</sub> OS | C <sub>23</sub> H <sub>14</sub> OS |
| <b>Formula weight</b>    | 338.40                             | 338.40                             |
| <b>Temperature/K</b>     | <b>298</b>                         | <b>400</b>                         |
| <b>Crystal system</b>    | monoclinic                         | monoclinic                         |
| <b>Space group</b>       | P2 <sub>1</sub> /c                 | P2 <sub>1</sub> /c                 |
| <b>a/Å</b>               | 12.9474(18)                        | 13.183(11)                         |
| <b>b/Å</b>               | 11.1005(17)                        | 11.272(8)                          |
| <b>c/Å</b>               | 11.7019(17)                        | 11.792(8)                          |
| <b>α/°</b>               | 90                                 | 90                                 |
| <b>β/°</b>               | 97.279(5)                          | 97.60(3)                           |
| <b>γ/°</b>               | 90                                 | 90                                 |



|                                                   |                                                               |                                                               |
|---------------------------------------------------|---------------------------------------------------------------|---------------------------------------------------------------|
| <b>Volume/Å<sup>3</sup></b>                       | 1668.3(4)                                                     | 1737(2)                                                       |
| <b>Z</b>                                          | 4                                                             | 4                                                             |
| <b>ρ<sub>calc</sub>/cm<sup>3</sup></b>            | 1.347                                                         | 1.294                                                         |
| <b>μ/mm<sup>-1</sup></b>                          | 0.201                                                         | 0.193                                                         |
| <b>F(000)</b>                                     | 704.0                                                         | 704.0                                                         |
| <b>Crystal size/mm<sup>3</sup></b>                | 0.399 × 0.211 × 0.111                                         | 0.399 × 0.211 × 0.111                                         |
| <b>Radiation</b>                                  | MoKα (λ = 0.71073)                                            | MoKα (λ = 0.71073)                                            |
| <b>2Θ range for data collection/°</b>             | 3.172 to 52.824                                               | 3.116 to 53.81                                                |
| <b>Index ranges</b>                               | -14 ≤ h ≤ 16, -13 ≤ k ≤ 11, -14 ≤ l ≤ 14                      | -16 ≤ h ≤ 16, -14 ≤ k ≤ 13, -14 ≤ l ≤ 14                      |
| <b>Reflections collected</b>                      | 22309                                                         | 18361                                                         |
| <b>Independent reflections</b>                    | 3417 [R <sub>int</sub> = 0.0323, R <sub>sigma</sub> = 0.0255] | 3576 [R <sub>int</sub> = 0.0512, R <sub>sigma</sub> = 0.0482] |
| <b>Data/restraints/parameters</b>                 | 3417/0/226                                                    | 3576/0/226                                                    |
| <b>Goodness-of-fit on F<sup>2</sup></b>           | 1.027                                                         | 1.010                                                         |
| <b>Final R indexes [I&gt;=2σ (I)]</b>             | R <sub>1</sub> = 0.0365, wR <sub>2</sub> = 0.0840             | R <sub>1</sub> = 0.0437, wR <sub>2</sub> = 0.0934             |
| <b>Final R indexes [all data]</b>                 | R <sub>1</sub> = 0.0593, wR <sub>2</sub> = 0.0967             | R <sub>1</sub> = 0.1038, wR <sub>2</sub> = 0.1183             |
| <b>Largest diff. peak/hole / e Å<sup>-3</sup></b> | 0.19/-0.22                                                    | 0.14/-0.18                                                    |

**Table S3.** Change in unit cell parameters of (Z)-HTI-An at 298 K and 400 K.

| Unit Cell    | (Z)-HTI-An at 298K | (Z')-HTI-An at 400K | Expansion (%) |
|--------------|--------------------|---------------------|---------------|
| <b>a (Å)</b> | 12.9474(18)        | 13.183(11)          | 1.82          |

|                               |             |           |      |
|-------------------------------|-------------|-----------|------|
| <b>b (Å)</b>                  | 11.1005(17) | 11.272(8) | 1.54 |
| <b>c (Å)</b>                  | 11.7019(17) | 11.792(8) | 0.77 |
| <b>Volume (Å<sup>3</sup>)</b> | 1668.3(4)   | 1737(2)   | 4.24 |

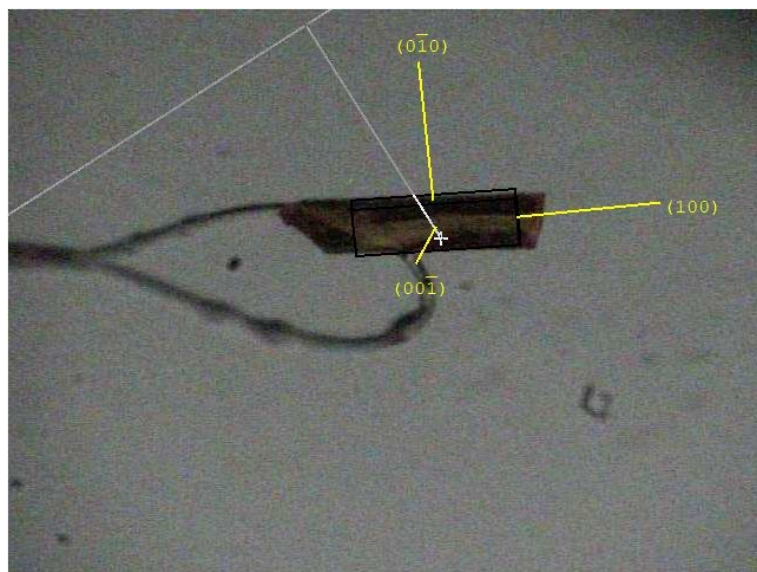

**Figure S10.** Face indexing of (Z)-HTI-An.

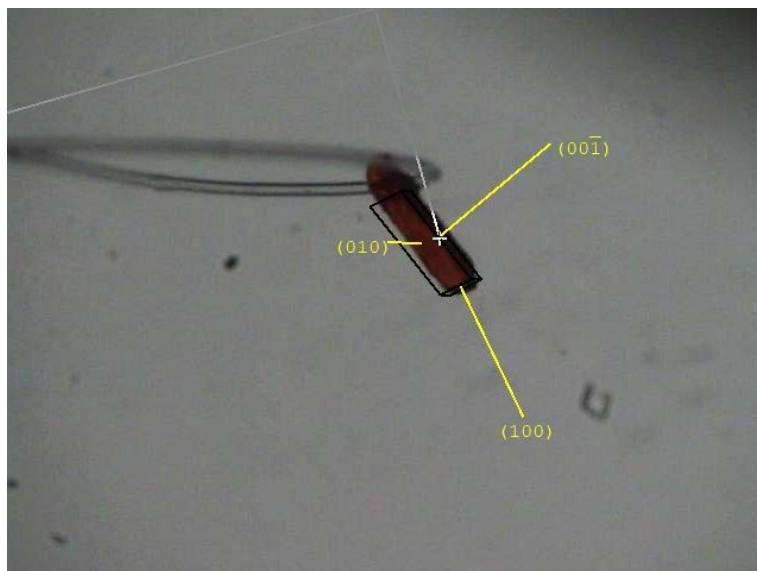

**Figure S11.** Face indexing of (E)-HTI-An.

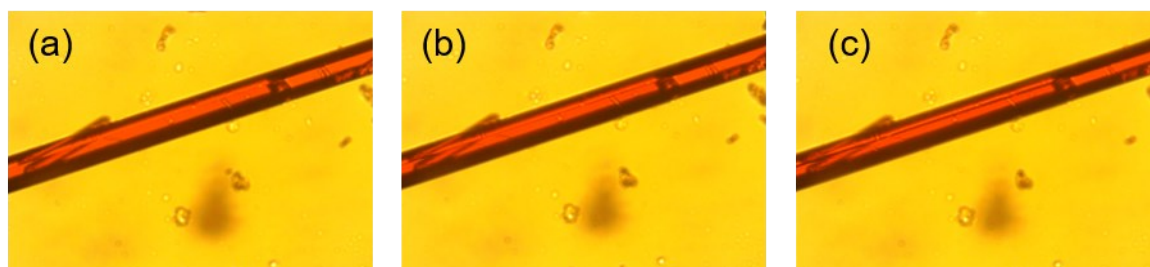

**Figure S12.** Slow heating of single crystal of (Z)-HTI-An induces a phase transition resulting in cracking along (001) plane.

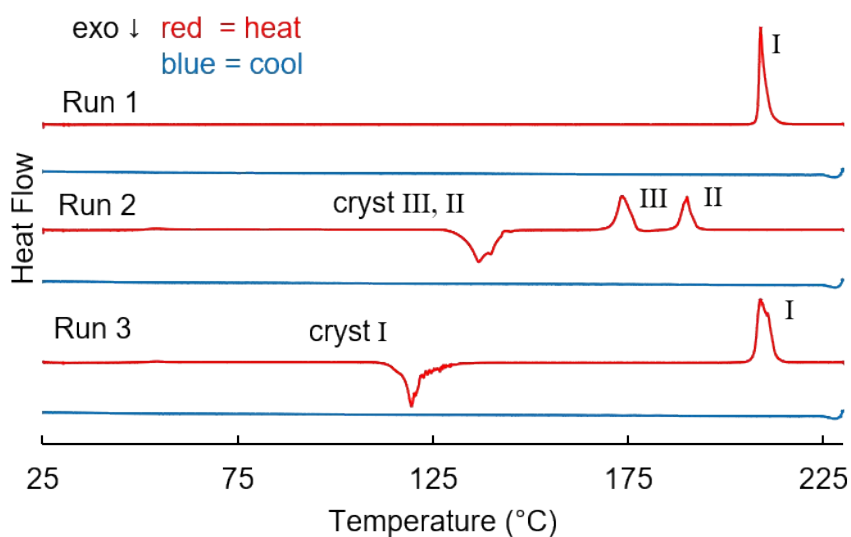

**Figure S13.** DSC heating/cooling runs beginning with crystalline (Z)-HTI-An. Run 1 shows the melting point of (Z)-HTI-An (I). Run 2 shows both crystallization and melting of two distinct new phases. Run 3 shows the recrystallization and remelting of phase I (Z)-HTI-An.

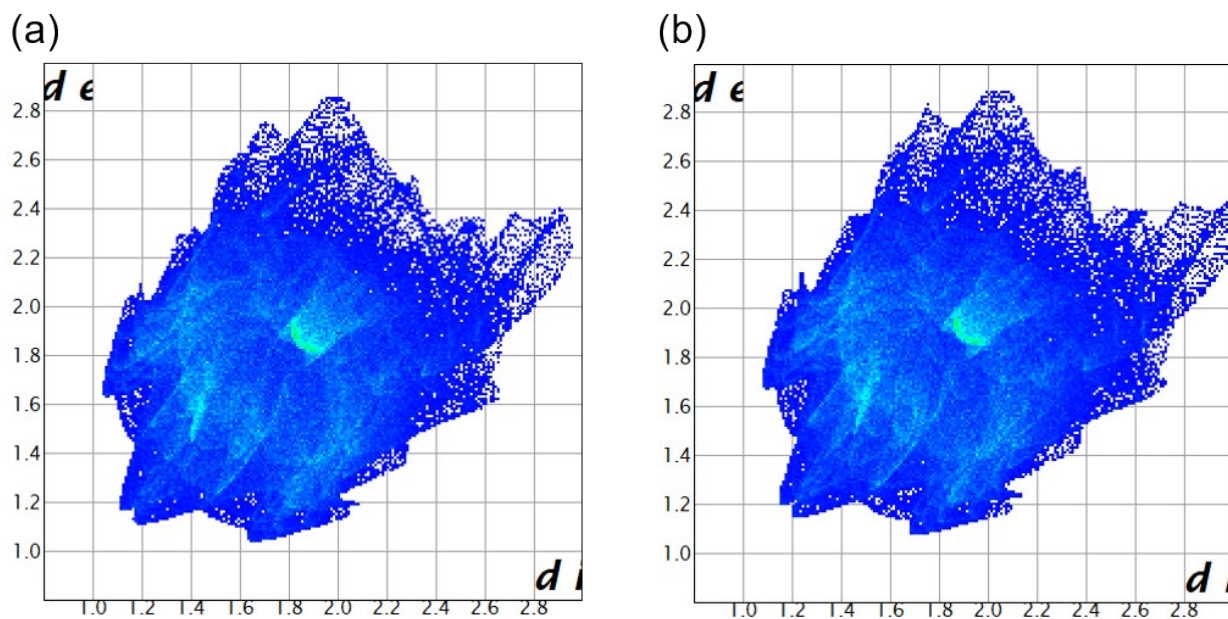

**Figure S14.** 2D Hirshfeld fingerprint plots of (a) (Z)-HTI-An and (b) (Z')-HTI-An.

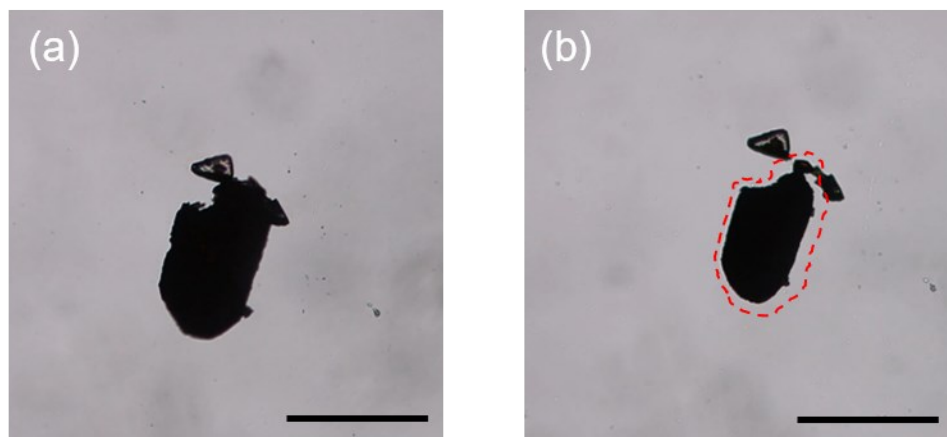

**Figure S15.** Crystal size reduction during thermal reversion of (*E*)-HTI-An at 180 °C for 2 hours. Scale bars are 200 μm.
